# Supplementary material for: Association between Plant-Based Dietary Patterns and Risk of Cardiovascular Disease: A Systematic Review and Meta-Analysis of Prospective Cohort Studies
Source: MDPI journal article supplement (doi:10.3390/nu13113952), 2021-11-05
Supplement: s1 [file s1]

# Supplementary Material

## Association between plant-based dietary patterns and risk of cardiovascular disease: a systematic review and meta-analysis of prospective cohort studies

Zuo Hua Gan, Huey Chiat Cheong, Yu-Kang Tu, Po-Hsiu Kuo

### **Content**

|                                                                                                                                                                                                                                                          |    |
|----------------------------------------------------------------------------------------------------------------------------------------------------------------------------------------------------------------------------------------------------------|----|
| Supplemental Table S1. Full search strategy .....                                                                                                                                                                                                        | 2  |
| Supplemental Table S2. Inclusion and exclusion criteria for study selection.....                                                                                                                                                                         | 4  |
| Supplemental Figure S1. Forest plot of the adjusted relative risk (RR) of plant-based diet and (A) ischemic and (B) hemorrhagic stroke risks. ....                                                                                                       | 5  |
| Supplemental Table S3. Subgroup analyses of the association between plant-based diet and cardiovascular disease, coronary heart disease and stroke risk .....                                                                                            | 6  |
| Supplemental Table S4. Slope ( $\beta$ ), 95% CI, and P Values for Meta-Regression Models.....                                                                                                                                                           | 9  |
| Supplemental Figure S2. Funnel plot of the relative risk ratio (RR) of plant-based diet and (A) cardiovascular disease, (B) coronary heart disease and (C) stroke risks .....                                                                            | 10 |
| Supplemental Figure S3. Forest plot of the adjusted relative risk (RR) of plant-based diet and (A) cardiovascular disease and (B) stroke risks with included studies and imputed studies with the trim-and-fill approach. ....                           | 12 |
| Supplemental Table S5. Quality assessment of included studies.....                                                                                                                                                                                       | 13 |
| Supplemental Figure S4. Forest plot of the adjusted relative risk (RR) of (A) cardiovascular disease, (B) coronary heart disease and (C) stroke risks for highest versus lowest adherence to plant-based dietary patterns with sensitivity analyses..... | 15 |

**Correspondence:** Po-Hsiu Kuo, [phkuo@ntu.edu.tw](mailto:phkuo@ntu.edu.tw); Institute of Epidemiology and Preventive Medicine, National Taiwan University, Room 501, No. 17, Xu-Zhou Road, Taipei 100, Taiwan.

**Supplemental Table S1. Full search strategy**

|                                                                                                                                                                                                                                                                                                                                                                                                                                                                                                                                                                                                                                                                                                                                                                                                                                                                                                                                                                                                                                                                                                                                                                                                                                                                                                                                                                                                                                                                                                                                                                                                                                                                                                                                                                                                                                                                                                                                                                                                                                                                                                                                                                                                                                                                                                                                                                                      |
|--------------------------------------------------------------------------------------------------------------------------------------------------------------------------------------------------------------------------------------------------------------------------------------------------------------------------------------------------------------------------------------------------------------------------------------------------------------------------------------------------------------------------------------------------------------------------------------------------------------------------------------------------------------------------------------------------------------------------------------------------------------------------------------------------------------------------------------------------------------------------------------------------------------------------------------------------------------------------------------------------------------------------------------------------------------------------------------------------------------------------------------------------------------------------------------------------------------------------------------------------------------------------------------------------------------------------------------------------------------------------------------------------------------------------------------------------------------------------------------------------------------------------------------------------------------------------------------------------------------------------------------------------------------------------------------------------------------------------------------------------------------------------------------------------------------------------------------------------------------------------------------------------------------------------------------------------------------------------------------------------------------------------------------------------------------------------------------------------------------------------------------------------------------------------------------------------------------------------------------------------------------------------------------------------------------------------------------------------------------------------------------|
| <b>PubMed</b>                                                                                                                                                                                                                                                                                                                                                                                                                                                                                                                                                                                                                                                                                                                                                                                                                                                                                                                                                                                                                                                                                                                                                                                                                                                                                                                                                                                                                                                                                                                                                                                                                                                                                                                                                                                                                                                                                                                                                                                                                                                                                                                                                                                                                                                                                                                                                                        |
| <p>("plant-based" OR "plant-based diet" OR ("diet, vegetarian"[MeSH Terms]) OR ("diet"[All Fields] AND "vegetarian"[All Fields]) OR "vegetarian diet"[All Fields] OR ("diet"[All Fields] AND "vegetarian"[All Fields]) OR "diet, vegetarian"[All Fields]) OR ("diet, vegetarian"[MeSH Terms] OR ("diet"[All Fields] AND "vegetarian"[All Fields]) OR "vegetarian diet"[All Fields] OR ("vegetarian"[All Fields] AND "diets"[All Fields]) OR "vegetarian diets"[All Fields]) OR ("diet, vegetarian"[MeSH Terms] OR ("diet"[All Fields] AND "vegetarian"[All Fields]) OR "vegetarian diet"[All Fields] OR ("vegetarian"[All Fields] AND "diet"[All Fields])) OR ("diet, vegetarian"[MeSH Terms] OR ("diet"[All Fields] AND "vegetarian"[All Fields]) OR "vegetarian diet"[All Fields] OR "vegetarianism"[All Fields]) OR ("diet, vegan"[MeSH Terms] OR ("diet"[All Fields] AND "vegan"[All Fields]) OR "vegan diet"[All Fields] OR ("diet"[All Fields] AND "vegan"[All Fields]) OR "diet, vegan"[All Fields]) OR "vegetarian diet"[All Fields] OR ("vegans"[MeSH Terms] OR "vegans"[All Fields]) OR ("vegetarians"[MeSH Terms] OR "vegetarians"[All Fields])) AND</p> <p>('cardiovascular disease'[All Fields] OR 'cardiovascular diseases'[MeSH Terms] OR 'coronary artery disease'[All Fields] OR 'myocardial infarction'[MeSH Terms] OR ('myocardial'[All Fields] AND 'infarction'[All Fields]) OR 'myocardial infarction'[All Fields]) OR ('stroke'[MeSH Terms] OR 'stroke'[All Fields]) OR 'cerebrovascular disease'[All Fields]) AND</p> <p>("observational study"[tiab] OR "observational studies"[tiab] OR "cohort studies"[MeSh] OR "cohort studies"[tiab] OR "case-control studies"[MeSh] OR "case-control studies"[tiab] OR "cross-sectional studies"[MeSh] OR "cross-sectional studies"[tiab] OR "epidemiologic studies"[MeSh] OR "epidemiologic studies"[tiab] OR "follow-up studies"[MeSh] OR "follow-up studies"[tiab] OR "longitudinal studies"[MeSh] OR "longitudinal studies"[tiab] OR "prospective studies"[MeSh] OR "prospective studies"[tiab] OR "retrospective studies"[MeSh] OR "retrospective studies"[tiab] OR "cohort study"[tiab] OR "case-control study"[tiab] OR "cross-sectional study"[tiab] OR "epidemiologic study"[tiab] OR "follow-up study"[tiab] OR "longitudinal study"[tiab] OR "prospective study"[tiab] OR "retrospective study"[tiab]))</p> |
| <b>EMBASE</b>                                                                                                                                                                                                                                                                                                                                                                                                                                                                                                                                                                                                                                                                                                                                                                                                                                                                                                                                                                                                                                                                                                                                                                                                                                                                                                                                                                                                                                                                                                                                                                                                                                                                                                                                                                                                                                                                                                                                                                                                                                                                                                                                                                                                                                                                                                                                                                        |
| <p>('plant-based' OR 'plant diet' OR 'plant-based diet' OR ('vegetarian'/exp OR 'vegetarian') AND ('diets'/exp OR 'diets') OR 'vegetarian diets' OR (('vegetarian'/exp OR 'vegetarian') AND ('diet'/exp OR 'diet')) OR 'diet, vegetarian'/exp OR 'diet, vegetarian' OR (('diet'/exp OR 'diet') AND ('vegetarian'/exp OR 'vegetarian')) OR 'vegetarianism'/exp OR 'vegetarianism' OR 'vegan diet'/exp OR 'vegan diet' OR (('diet'/exp OR 'diet') AND ('vegan'/exp OR 'vegan')) OR 'diet, vegan'/exp OR 'diet, vegan' OR 'vegetarian diet'/exp OR 'vegetarian diet' OR 'vegans'/exp OR 'vegans' OR 'vegetarians'/exp OR 'vegetarians') AND</p> <p>((('cardiovascular disease' OR 'cardiovascular disease'/exp OR 'myocardial infarction' OR ('myocardial' AND 'infarction') OR 'myocardial infarction'/exp OR 'cerebrovascular disease' OR 'cerebrovascular disease'/exp OR 'stroke' OR 'stroke'/exp) AND</p> <p>(observational studies or 'observational study'/exp or Cohort studies or 'cohort analysis'/exp or case control studies or 'case control study'/exp or cross sectional studies or 'cross-sectional study'/exp or epidemiologic studies or 'epidemiology'/exp or follow-up studies or 'follow up'/exp or longitudinal studies or 'longitudinal study'/exp or prospective studies or 'prospective study'/exp or retrospective studies or 'retrospective study'/exp))</p>                                                                                                                                                                                                                                                                                                                                                                                                                                                                                                                                                                                                                                                                                                                                                                                                                                                                                                                                                                                                 |
| <b>Web of Science</b>                                                                                                                                                                                                                                                                                                                                                                                                                                                                                                                                                                                                                                                                                                                                                                                                                                                                                                                                                                                                                                                                                                                                                                                                                                                                                                                                                                                                                                                                                                                                                                                                                                                                                                                                                                                                                                                                                                                                                                                                                                                                                                                                                                                                                                                                                                                                                                |

TS = (plant-based OR plant-based diet OR vegetarian OR vegetarianism OR vegan) **AND**  
TS = (cardiovascular disease OR myocardial infarction OR cerebrovascular disease) **AND**  
TS = (observational OR cohort OR case-control OR cross-sectional OR epidemiologic OR follow-up OR  
longitudinal OR prospective OR retrospective)

**Supplemental Table S2. Inclusion and exclusion criteria for study selection**

|                         | <b>Inclusion criteria</b>                                                                                                                                                                                                                                                                                                                                       | <b>Exclusion criteria</b>                                                                                                                                                 |
|-------------------------|-----------------------------------------------------------------------------------------------------------------------------------------------------------------------------------------------------------------------------------------------------------------------------------------------------------------------------------------------------------------|---------------------------------------------------------------------------------------------------------------------------------------------------------------------------|
| <b>Study type</b>       | Prospective cohort, case-cohort studies, or nested case-control studies                                                                                                                                                                                                                                                                                         | Retrospective case-control studies, cross-sectional studies, literature reviews and meta-analyses, commentaries, editorials, letters, case reports, and meeting abstracts |
| <b>Study population</b> | Healthy adults, at-risk adults                                                                                                                                                                                                                                                                                                                                  | Children, adults with previous major cardiovascular diseases                                                                                                              |
| <b>Exposure</b>         | Plant-based dietary patterns (avoidance of animal foods as assessed by questionnaire, a priori or posteriori dietary patterns)                                                                                                                                                                                                                                  | Unclear definitions of dietary exposure or measurements                                                                                                                   |
| <b>Outcome</b>          | Multivariate adjusted effect estimates (OR, RR, HR)<br><ol style="list-style-type: none"> <li>1. Total cardiovascular disease (CVD)</li> <li>2. Fatal coronary heart disease (CHD)</li> <li>3. Nonfatal CHD</li> <li>4. Total stroke</li> <li>5. Fatal stroke</li> <li>6. Nonfatal stroke</li> <li>7. Ischemic stroke</li> <li>8. Hemorrhagic stroke</li> </ol> | Crude effect estimates only                                                                                                                                               |

(A)

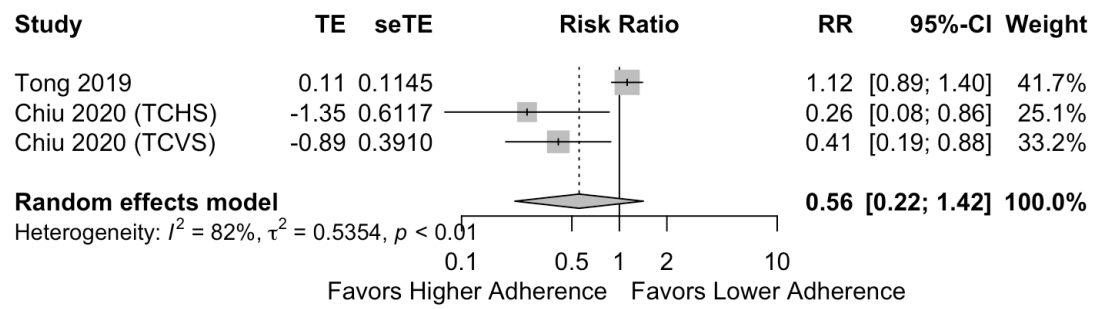

(B)

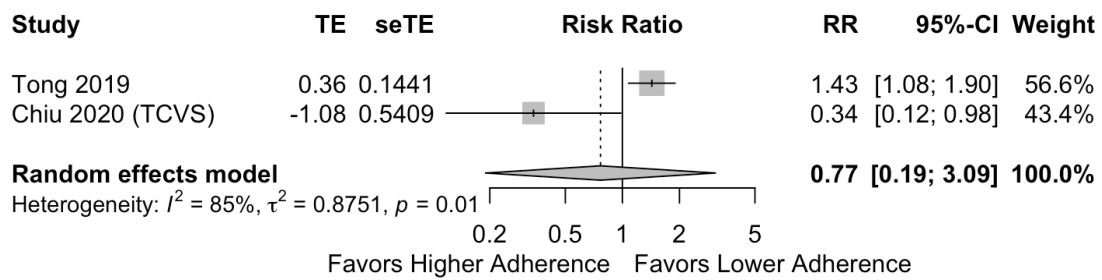

**Supplemental Figure S1. Forest plot of the adjusted relative risk (RR) of plant-based diet and (A) ischemic and (B) hemorrhagic stroke risks.**

**Supplemental Table S3. Subgroup analyses of the association between plant-based diet and cardiovascular disease, coronary heart disease and stroke risk**

| Subgroups                     | No. of studies | RR (95% CI)       | Heterogeneity between study, I <sup>2</sup> , p value | Test for subgroup differences, p value |
|-------------------------------|----------------|-------------------|-------------------------------------------------------|----------------------------------------|
| <b>Cardiovascular disease</b> |                |                   |                                                       |                                        |
| Sex                           |                |                   |                                                       | 0.17                                   |
| Male                          | 3              | 0.88 (0.83, 0.94) | 12%, 0.32                                             |                                        |
| Female                        | 4              | 0.80 (0.71, 0.91) | 83%, <0.01                                            |                                        |
| Mean age                      |                |                   |                                                       |                                        |
| >50                           | 6              | 0.88 (0.84, 0.92) | 36%, 0.17                                             | < 0.01                                 |
| ≤50                           | 3              | 0.73 (0.63, 0.84) | 41%, 0.18                                             |                                        |
| Country                       |                |                   |                                                       | 0.05                                   |
| USA                           | 5              | 0.84 (0.79, 0.91) | 56%, 0.06                                             |                                        |
| UK                            | 2              | 0.85 (0.73, 0.99) | 84%, 0.01                                             |                                        |
| Taiwan                        | 2              | 0.52 (0.36, 0.76) | 0%, 0.96                                              |                                        |
| Follow up duration            |                |                   |                                                       | 0.76                                   |
| ≤20 years                     | 5              | 0.82 (0.70, 0.96) | 72%, <0.01                                            |                                        |
| >20 years                     | 4              | 0.84 (0.78, 0.90) | 61%, 0.05                                             |                                        |
| Diet classification method    |                |                   |                                                       | 0.30                                   |
| Questionnaire                 | 4              | 0.78 (0.65, 0.93) | 78%, <0.01                                            |                                        |
| A priori                      | 4              | 0.84 (0.78, 0.90) | 61%, 0.05                                             |                                        |
| A posteriori                  | 1              | 1.02 (0.76, 1.36) | -                                                     |                                        |
| Outcome                       |                |                   |                                                       | 0.04                                   |
| CVD                           | 4              | 0.86 (0.80, 0.92) | 71%, 0.01                                             |                                        |
| CHD                           | 3              | 0.83 (0.75, 0.92) | 37%, 0.20                                             |                                        |
| CVA                           | 2              | 0.52 (0.36, 0.76) | 0%, 0.96                                              |                                        |
| Study quality scores          |                |                   |                                                       | 0.03                                   |
| 7                             | 3              | 0.66 (0.48, 0.90) | 51%, 0.13                                             |                                        |
| 8                             | 4              | 0.84 (0.78, 0.90) | 61%, 0.05                                             |                                        |
| 9                             | 2              | 0.91 (0.87, 0.96) | 0%, 0.45                                              |                                        |
| <b>Coronary heart disease</b> |                |                   |                                                       |                                        |
| Sex                           |                |                   |                                                       | 0.55                                   |
| Male                          | 3              | 0.89 (0.79, 1.01) | 34%, 0.22                                             |                                        |
| Female                        | 4              | 0.82 (0.67, 1.01) | 73%, 0.01                                             |                                        |
| Mean age                      |                |                   |                                                       |                                        |
| >50                           | 5              | 0.93 (0.87, 1.00) | 0%, 0.66                                              | < 0.01                                 |

| Subgroups                  | No. of studies | RR (95% CI)       | Heterogeneity between study, I <sup>2</sup> , p value | Test for subgroup differences, p value |
|----------------------------|----------------|-------------------|-------------------------------------------------------|----------------------------------------|
| ≤50                        | 1              | 0.78 (0.70, 0.87) | -                                                     |                                        |
| Country                    |                |                   |                                                       | 0.61                                   |
| USA                        | 4              | 0.92 (0.83, 1.01) | 0%, 0.56                                              |                                        |
| UK                         | 2              | 0.86 (0.71, 1.06) | 85%, 0.01                                             |                                        |
| Follow up duration         |                |                   |                                                       | 0.54                                   |
| ≤20 years                  | 4              | 0.91 (0.80, 1.03) | 67%, 0.03                                             |                                        |
| >20 years                  | 2              | 0.85 (0.73, 0.99) | 0%, 0.55                                              |                                        |
| Diet classification method |                |                   |                                                       | 0.66                                   |
| Questionnaire              | 2              | 0.86 (0.71, 1.06) | 85%, 0.01                                             |                                        |
| A priori                   | 3              | 0.90 (0.81, 0.94) | 0%, 0.48                                              |                                        |
| A posteriori               | 1              | 1.02 (0.76, 1.36) | -                                                     |                                        |
| Healthful plant-based diet |                |                   |                                                       | 0.32                                   |
| Yes                        | 5              | 0.87 (0.78, 0.96) | 41%, 0.15                                             |                                        |
| No                         | 5              | 0.86 (0.79, 0.92) | 27%, 0.22                                             |                                        |
| Study quality scores       |                |                   |                                                       | 0.02                                   |
| 7                          | 1              | 0.78 (0.70, 0.87) | -                                                     |                                        |
| 8                          | 3              | 0.90 (0.82, 1.00) | 0%, 0.48                                              |                                        |
| 9                          | 2              | 0.97 (0.87, 1.08) | 0%, 0.70                                              |                                        |
| <b>Stroke</b>              |                |                   |                                                       |                                        |
| Country                    |                |                   |                                                       | 0.01                                   |
| USA                        | 2              | 0.91 (0.89, 0.93) | 0%, 0.62                                              |                                        |
| UK                         | 2              | 1.02 (0.72, 1.44) | 83%, 0.02                                             |                                        |
| Taiwan                     | 2              | 0.52 (0.35, 0.76) | 0%, 0.96                                              |                                        |
| Follow up duration         |                |                   |                                                       | 0.06                                   |
| ≤20 years                  | 3              | 0.65 (0.45, 0.96) | 53%, 0.12                                             |                                        |
| >20 years                  | 3              | 0.98 (0.80, 1.19) | 83%, <0.01                                            |                                        |
| Diet classification method |                |                   |                                                       | 0.67                                   |
| Questionnaire              | 4              | 0.78 (0.53, 1.15) | 84%, <0.01                                            |                                        |
| A priori                   | 1              | 0.91 (0.89, 0.93) | -                                                     |                                        |
| A posteriori               | 1              | 0.85 (0.65, 1.12) | -                                                     |                                        |
| Study quality scores       |                |                   |                                                       | 0.57                                   |
| 7                          | 3              | 0.72 (0.36, 1.41) | 87%, 0.01                                             |                                        |
| 8                          | 1              | 0.91 (0.89, 0.93) | -                                                     |                                        |
| 9                          | 2              | 0.84 (0.70, 1.01) | 0%, 0.95                                              |                                        |

The summary RR estimates were calculated using the random-effects models. The reference was the lowest adherence to the plant-based diet category



**Supplemental Table S4. Slope ( $\beta$ ), 95% CI, and P Values for Meta-Regression Models**

|                              | CVD risk               |         | CHD risk               |         | Stroke risk            |         |
|------------------------------|------------------------|---------|------------------------|---------|------------------------|---------|
|                              | $\beta$ , 95% CI       | P value | $\beta$ , 95% CI       | P value | $\beta$ , 95% CI       | P value |
| Mean age at baseline (years) | 0.013 (0.006, 0.019)   | < 0.001 | 0.016 (0.005, 0.027)   | 0.006   | -0.009 (-0.041, 0.024) | 0.594   |
| Mean BMI at baseline         | 0.029 (-0.007, 0.065)  | 0.109   | 0.056 (0.018, 0.093)   | 0.004   | -0.053 (-0.128, 0.023) | 0.170   |
| Female proportion (%)        | -0.001 (-0.003, 0.000) | 0.109   | -0.002 (-0.004, 0.001) | 0.175   | 0.013 (-0.008, 0.033)  | 0.237   |
| Length of follow up (years)  | -0.002 (-0.009, 0.006) | 0.648   | -0.005 (-0.015, 0.005) | 0.319   | 0.011 (-0.015, 0.046)  | 0.409   |
| Smokers proportion (%)       | -0.002 (-0.013, 0.009) | 0.744   | -0.004 (-0.022, 0.016) | 0.763   | 0.001 (-0.017, 0.020)  | 0.903   |

Abbreviation: BMI, Body Mass Index; CHD, Coronary heart disease; CVD, Cardiovascular disease

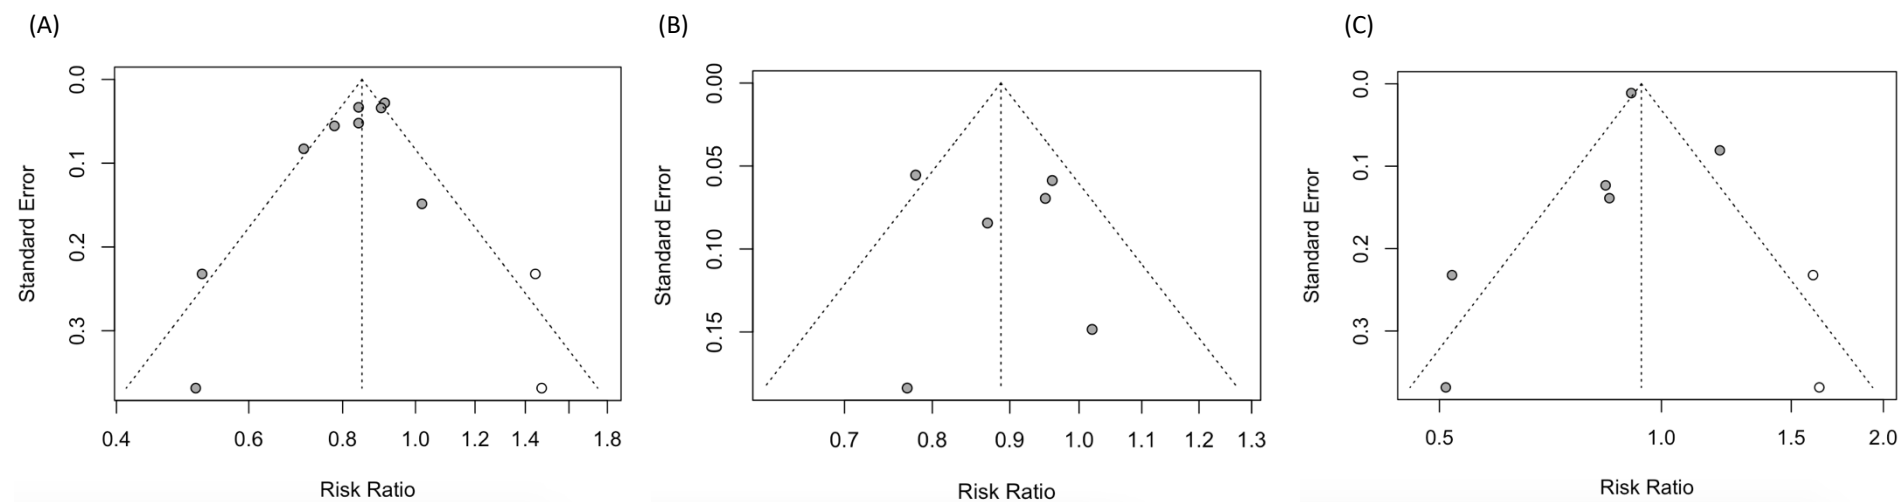

**Supplemental Figure S2. Funnel plot of the relative risk ratio (RR) of plant-based diet and (A) cardiovascular disease, (B) coronary heart disease and (C) stroke risks.** Gray circles = included studies; white circles = imputed studies with the trim-and-fill approach.

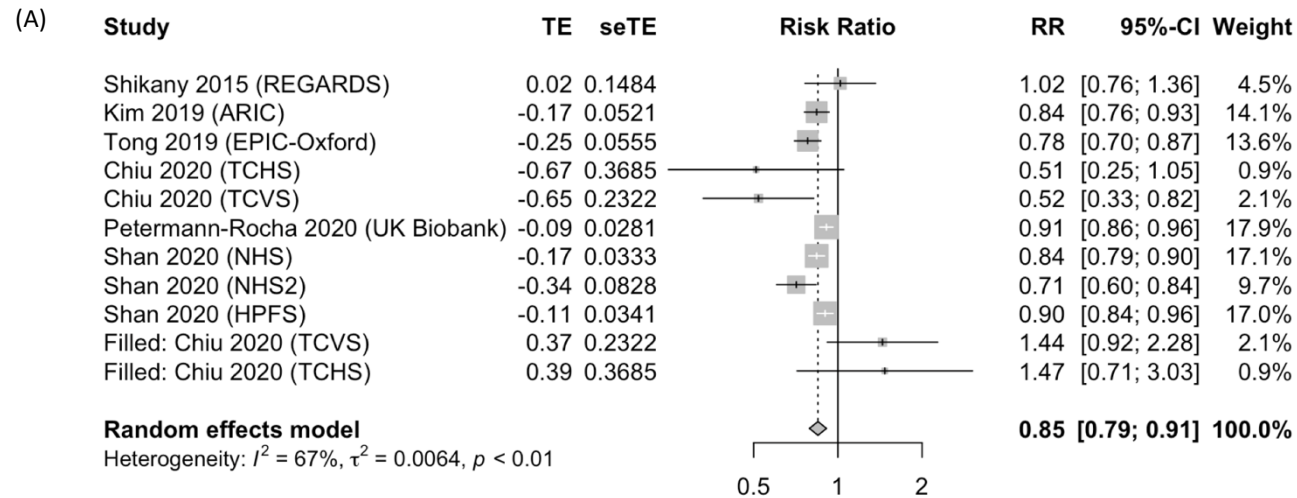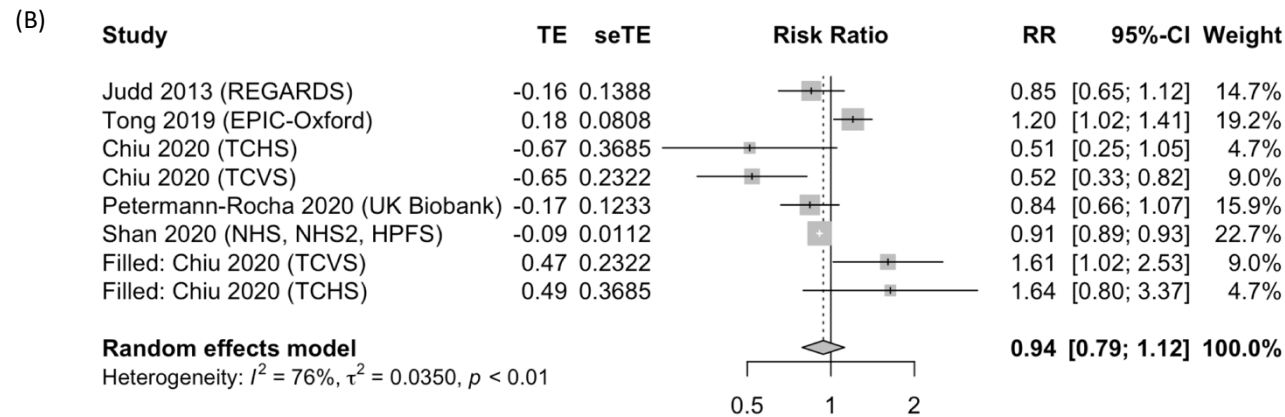

Supplemental Figure S3. Forest plot of the adjusted relative risk (RR) of plant-based diet and (A) cardiovascular disease and (B) stroke risks with included studies and imputed studies with the trim-and-fill approach.

**Supplemental Table S5. Quality assessment of included studies.**

| Cohort studies          | Selection                                   |                                        |                              |                                                                                   | Comparability |                          | Exposure                                              |                                        | Total |
|-------------------------|---------------------------------------------|----------------------------------------|------------------------------|-----------------------------------------------------------------------------------|---------------|--------------------------|-------------------------------------------------------|----------------------------------------|-------|
|                         | Representativeness<br>of the exposed cohort | Selection of the non<br>exposed cohort | Ascertainment of<br>exposure | Demonstration that<br>outcome of interest<br>was not present at<br>start of study | Comparability | Assessment of<br>outcome | Was follow-up long<br>enough for<br>outcomes to occur | Adequacy of<br>follow up of<br>cohorts |       |
| Crowe 2013              |                                             | ★                                      | ★                            | ★                                                                                 | ★★            | ★                        | ★                                                     | ★                                      | 8     |
| Judd 2013               | ★                                           | ★                                      | ★                            | ★                                                                                 | ★★            | ★                        | ★                                                     | ★                                      | 9     |
| Shikany 2015            | ★                                           | ★                                      | ★                            | ★                                                                                 | ★★            | ★                        | ★                                                     | ★                                      | 9     |
| Satija 2017 (NHS)       |                                             | ★                                      | ★                            | ★                                                                                 | ★★            | ★                        | ★                                                     | ★                                      | 8     |
| Satija 2017 (NHS2)      |                                             | ★                                      | ★                            | ★                                                                                 | ★★            | ★                        | ★                                                     | ★                                      | 8     |
| Satija 2017 (HPFS)      |                                             | ★                                      | ★                            | ★                                                                                 | ★★            | ★                        | ★                                                     | ★                                      | 8     |
| Kim 2019                | ★                                           | ★                                      | ★                            | ★                                                                                 | ★★            | ★                        | ★                                                     |                                        | 8     |
| Tong 2019               |                                             | ★                                      | ★                            | ★                                                                                 | ★★            | ★                        | ★                                                     |                                        | 7     |
| Chiu 2020               |                                             | ★                                      | ★                            | ★                                                                                 | ★★            | ★                        | ★                                                     |                                        | 7     |
| Heianza 2020            | ★                                           | ★                                      | ★                            | ★                                                                                 | ★★            | ★                        | ★                                                     |                                        | 8     |
| Petermann-Rocha<br>2020 | ★                                           | ★                                      | ★                            | ★                                                                                 | ★★            | ★                        | ★                                                     | ★                                      | 9     |

Shan 2020

★

★

★

★★

★

★

★

8

---

(A)

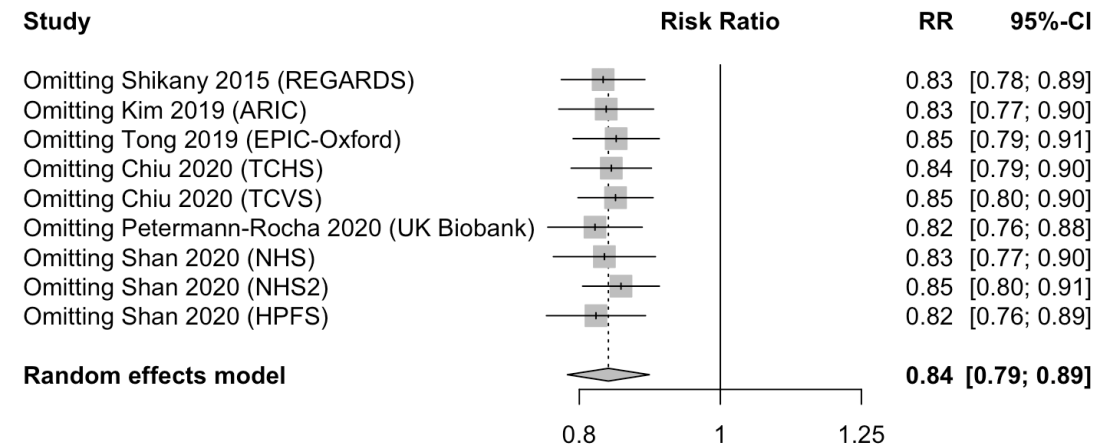

(B)

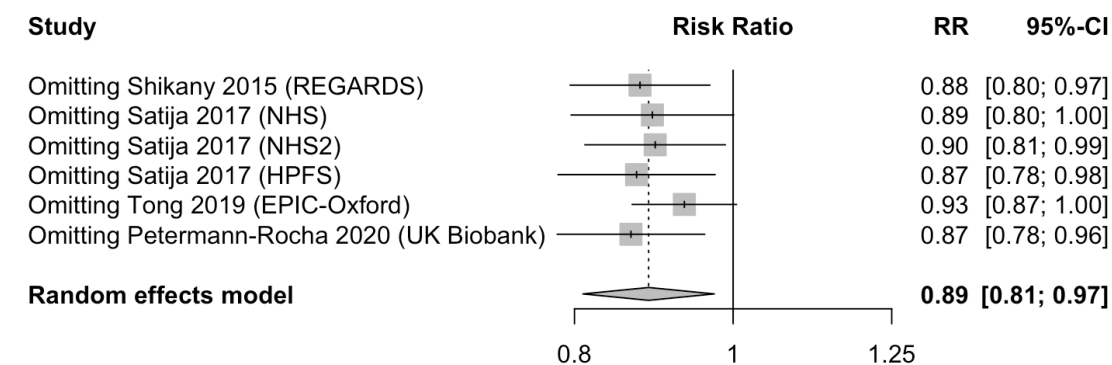

(C)

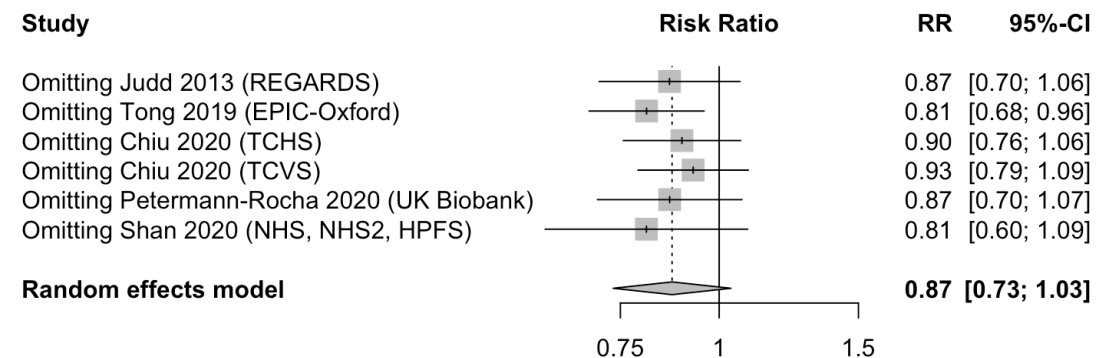

**Supplemental Figure S4. Forest plot of the adjusted relative risk (RR) of (A) cardiovascular disease, (B) coronary heart disease and (C) stroke risks for highest versus lowest adherence to plant-based dietary patterns with sensitivity analyses.**
